# Supplementary material
Source: Springer Nature journal article supplement (https://www.springermedizin.de/resource/supplementary/13063_2009_466_MOESM1_ESM.pdf/9618274)

**Multi-level model: patients nested within districts**

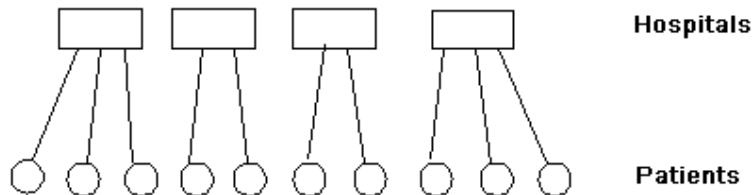

**Multiple membership model: some patients attend more than one hospital**

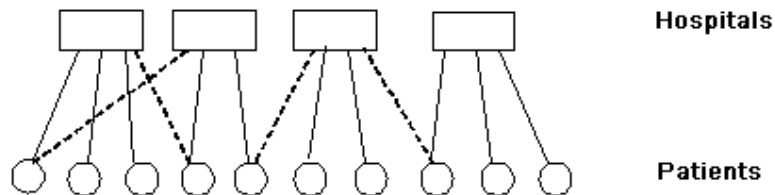

Supplement: MOESM1 [file 9618274]
